# Supplementary material for: Highlighting Entanglement of Cultures via Ranking of Multilingual Wikipedia Articles
Source: PubMed Central journal article supplement (PMC3789750; doi:10.1371/journal.pone.0074554), 2013-10-03
Supplement: pone.0074554.s001.pdf [file pone.0074554.s001.pdf]

**SUPPORTING INFORMATION FOR:**  
**Highlighting entanglement of cultures**  
**via ranking of multilingual Wikipedia articles**

Young-Ho Eom<sup>1</sup>, Dima L. Shepelyansky<sup>1,\*</sup>

*1 Laboratoire de Physique Théorique du CNRS, IRSAMC, Université de Toulouse, UPS, F-31062 Toulouse, France*

\* Webpage: [www.quantware.ups-tlse.fr/dima](http://www.quantware.ups-tlse.fr/dima)

## **1 Additional data**

Supplementary methods, tables, ranking lists and figures are available at

<http://www.quantware.ups-tlse.fr/QWLIB/wikiculturenetwork/>;

data sets of 9 hyperlink networks are available at

<http://vigna.dsi.unimi.it/>

by a direct request addressed to S.Vigna.

Here we present additional figures and tables for the main part of the paper.

Figures S1, S2, S3 show comparison between probability distributions over activity fields and language for top 30 and 100 persons for EN, IT, NK respectively.

Tables show top 30 persons in PageRank, CheiRank and 2DRank for all 9 Wikipedia editions. All names are given in English.

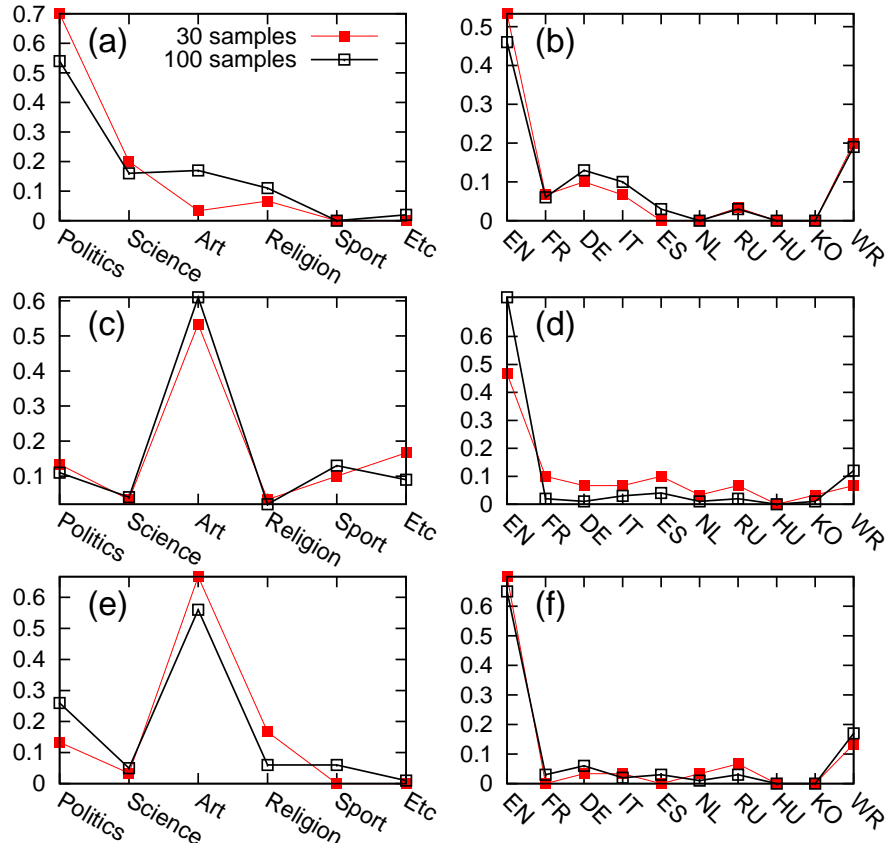

Figure S1: Probability distributions of activity fields and languages of top 30 persons and top 100 persons in English Wikipedia EN (total probability is normalized to unity): (a) Distribution of activity fields of PageRank top persons (b) Distribution of language of PageRank top persons. (c) Distribution of activity fields of CheiRank top persons (d) Distribution of language of CheiRank top persons. (e) Distribution of activity fields of 2DRank top persons (f) Distribution of language of 2DRank top persons.

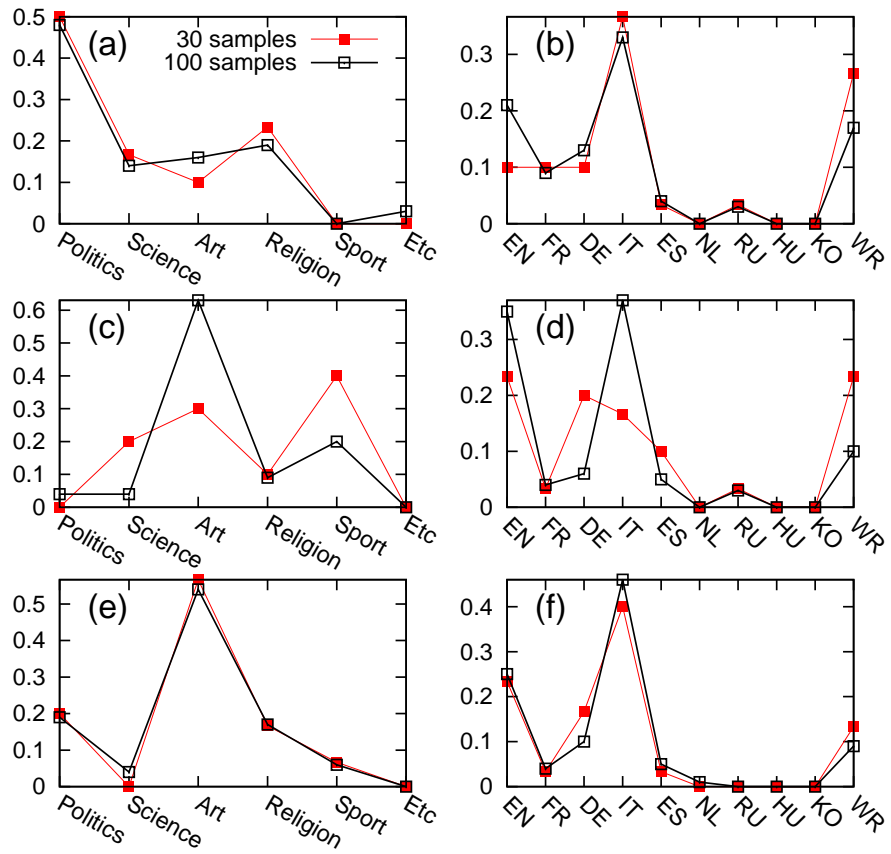

Figure S2: Same as in Fig.SI1 for Italian Wikipedia IT.

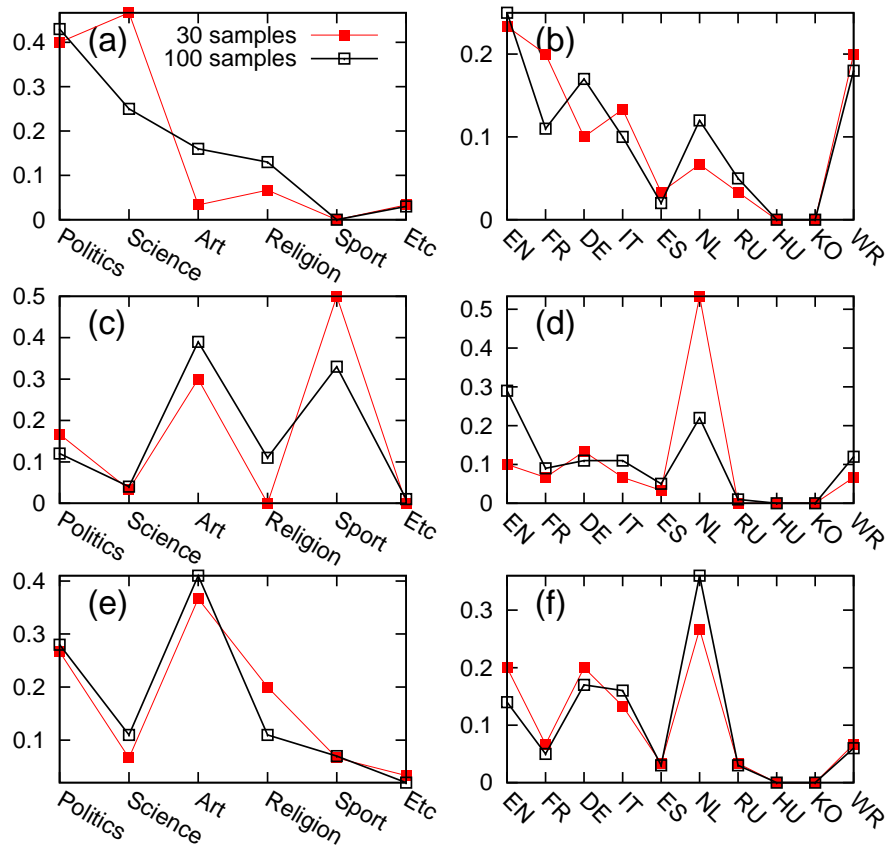

Figure S3: Same as in Fig.SI1 for Dutch Wikipedia NL.

Table S1: Top 30 persons by PageRank for English Wikipedia with their field of activity and native language.

| $R_{EN,PageRank}$ | Person                 | Field    | Culture |
|-------------------|------------------------|----------|---------|
| 1                 | Napoleon               | Politics | FR      |
| 2                 | Carl Linnaeus          | Science  | WR      |
| 3                 | George W. Bush         | Politics | EN      |
| 4                 | Barack Obama           | Politics | EN      |
| 5                 | Elizabeth II           | Politics | EN      |
| 6                 | Jesus                  | Religion | WR      |
| 7                 | William Shakespeare    | Art      | EN      |
| 8                 | Aristotle              | Science  | WR      |
| 9                 | Adolf Hitler           | Politics | DE      |
| 10                | Bill Clinton           | Politics | EN      |
| 11                | Franklin D. Roosevelt  | Politics | EN      |
| 12                | Ronald Reagan          | Politics | EN      |
| 13                | George Washington      | Politics | EN      |
| 14                | Plato                  | Science  | WR      |
| 15                | Richard Nixon          | Politics | EN      |
| 16                | Abraham Lincoln        | Politics | EN      |
| 17                | Joseph Stalin          | Politics | RU      |
| 18                | Winston Churchill      | Politics | EN      |
| 19                | John F. Kennedy        | Politics | EN      |
| 20                | Henry VIII of England  | Politics | EN      |
| 21                | Muhammad               | Religion | WR      |
| 22                | Thomas Jefferson       | Politics | EN      |
| 23                | Albert Einstein        | Science  | DE      |
| 24                | Alexander the Great    | Politics | WR      |
| 25                | Augustus               | Politics | IT      |
| 26                | Charlemagne            | Politics | FR      |
| 27                | Karl Marx              | Science  | DE      |
| 28                | Charles Darwin         | Science  | EN      |
| 29                | Elizabeth I of England | Politics | EN      |
| 30                | Julius Caesar          | Politics | IT      |

Table S2: Top 30 persons by 2DRank for English Wikipedia with their field of activity and native language.

| $R_{EN,2DRank}$ | Person                  | Field    | Culture |
|-----------------|-------------------------|----------|---------|
| 1               | Frank Sinatra           | Art      | EN      |
| 2               | Paul McCartney          | Art      | EN      |
| 3               | Michael Jackson         | Art      | EN      |
| 4               | Steven Spielberg        | Art      | EN      |
| 5               | Pope Pius XII           | Religion | IT      |
| 6               | Vladimir Putin          | Politics | RU      |
| 7               | Mariah Carey            | Art      | EN      |
| 8               | John Kerry              | Politics | EN      |
| 9               | Isaac Asimov            | Art      | EN      |
| 10              | Stephen King            | Art      | EN      |
| 11              | Dolly Parton            | Art      | EN      |
| 12              | Prince (musician)       | Art      | EN      |
| 13              | Robert Brown (botanist) | Science  | EN      |
| 14              | Vincent van Gogh        | Art      | NL      |
| 15              | Lady Gaga               | Art      | EN      |
| 16              | Beyoncé Knowles         | Art      | EN      |
| 17              | Pope John Paul II       | Religion | WR      |
| 18              | Lord Byron              | Art      | EN      |
| 19              | Muhammad                | Religion | WR      |
| 20              | Johnny Cash             | Art      | EN      |
| 21              | Alice Cooper            | Art      | EN      |
| 22              | Catherine the Great     | Politics | RU      |
| 23              | 14th Dalai Lama         | Religion | WR      |
| 24              | Christina Aguilera      | Art      | EN      |
| 25              | Marilyn Monroe          | Art      | EN      |
| 26              | David Bowie             | Art      | EN      |
| 27              | John McCain             | Politics | EN      |
| 28              | Bob Dylan               | Art      | EN      |
| 29              | Johann Sebastian Bach   | Art      | DE      |
| 30              | Jesus                   | Religion | WR      |

Table S2: Top 30 persons by CheiRank for English Wikipedia with their field of activity and native language.

| $R_{EN,CheiRank}$ | Person                         | Field    | Culture |
|-------------------|--------------------------------|----------|---------|
| 1                 | Roger Calmel                   | Art      | FR      |
| 2                 | C. H. Vijayashankar            | Politics | EN      |
| 3                 | Matt Kelley                    | ETC      | EN      |
| 4                 | Alberto Cavallari              | ETC      | IT      |
| 5                 | Yury Chernavsky                | Art      | RU      |
| 6                 | William Shakespeare (inventor) | ETC      | EN      |
| 7                 | Kelly Clarkson                 | Art      | EN      |
| 8                 | Park Ji-Sung                   | Sport    | KO      |
| 9                 | Mithun Chakraborty             | Art      | EN      |
| 10                | Olga Sedakova                  | Sport    | RU      |
| 11                | Sara García                    | Art      | ES      |
| 12                | Pope Pius XII                  | Religion | IT      |
| 13                | Andy Kerr                      | Politics | EN      |
| 14                | Joe-Max Moore                  | Sport    | EN      |
| 15                | Josef Kemr                     | Art      | WR      |
| 16                | Darius Milhaud                 | Art      | FR      |
| 17                | Jan Crull, Jr.                 | ETC      | EN      |
| 18                | Farshad Fotouhi                | Science  | EN      |
| 19                | Swaroop Kanchi                 | Art      | EN      |
| 20                | Jacques Lancelot               | Art      | FR      |
| 21                | František Martin Pecháček      | Art      | DE      |
| 22                | George Stephanekoulosech       | ETC      | EN      |
| 23                | Chano Urueta                   | Art      | ES      |
| 24                | Franz Pecháček                 | Art      | DE      |
| 25                | Nicolae Iorga                  | Politics | WR      |
| 26                | Arnold Houbraken               | Art      | NL      |
| 27                | August Derleth                 | Art      | EN      |
| 28                | Javier Solana                  | Politics | ES      |
| 29                | Drew Barrymore                 | Art      | EN      |
| 30                | Kevin Bloody Wilson            | Art      | EN      |

Table S4: Top 30 persons by PageRank for French Wikipedia with their field of activity and native language.

| $R_{FR,PageRank}$ | Person                        | Field    | Culture |
|-------------------|-------------------------------|----------|---------|
| 1                 | Napoleon                      | Politics | FR      |
| 2                 | Carl Linnaeus                 | Science  | WR      |
| 3                 | Louis XIV of France           | Politics | FR      |
| 4                 | Jesus                         | Religion | WR      |
| 5                 | Aristotle                     | Science  | WR      |
| 6                 | Julius Caesar                 | Politics | IT      |
| 7                 | Charles de Gaulle             | Politics | FR      |
| 8                 | Pope John Paul II             | Religion | WR      |
| 9                 | Adolf Hitler                  | Politics | DE      |
| 10                | Plato                         | Science  | WR      |
| 11                | Charlemagne                   | Politics | FR      |
| 12                | Joseph Stalin                 | Politics | RU      |
| 13                | Charles V, Holy Roman Emperor | Politics | ES      |
| 14                | Napoleon III                  | Politics | FR      |
| 15                | Nicolas Sarkozy               | Politics | FR      |
| 16                | Francois Mitterrand           | Politics | FR      |
| 17                | Victor Hugo                   | Art      | FR      |
| 18                | Jacques Chirac                | Politics | FR      |
| 19                | Honore de Balzac              | Art      | FR      |
| 20                | Mary (mother of Jesus)        | Religion | WR      |
| 21                | Voltaire                      | Art      | FR      |
| 22                | George W. Bush                | Politics | EN      |
| 23                | Elizabeth II                  | Politics | EN      |
| 24                | Muhammad                      | Religion | WR      |
| 25                | Francis I of France           | Politics | FR      |
| 26                | William Shakespeare           | Art      | EN      |
| 27                | Louis XVI of France           | Politics | FR      |
| 28                | Rene Descartes                | Science  | FR      |
| 29                | Karl Marx                     | Science  | DE      |
| 30                | Louis XV of France            | Politics | FR      |



Table S5: Top 30 persons by 2DRank for French Wikipedia with their field of activity and native language.

| $R_{FR,2DRank}$ | Person                    | Field    | Culture |
|-----------------|---------------------------|----------|---------|
| 1               | Franois Mitterrand        | Politics | FR      |
| 2               | Jacques Chirac            | Politics | FR      |
| 3               | Honore de Balzac          | Art      | FR      |
| 4               | Nicolas Sarkozy           | Politics | FR      |
| 5               | Napoleon III              | Politics | FR      |
| 6               | Otto von Bismarck         | Politics | DE      |
| 7               | Michael Jackson           | Art      | EN      |
| 8               | Adolf Hitler              | Politics | DE      |
| 9               | Ludwig van Beethoven      | Art      | DE      |
| 10              | Johnny Hallyday           | Art      | FR      |
| 11              | Napoleon                  | Politics | FR      |
| 12              | Leonardo da Vinci         | Art      | IT      |
| 13              | Jules Verne               | Art      | FR      |
| 14              | Jacques-Louis David       | Art      | FR      |
| 15              | Thomas Jefferson          | Politics | EN      |
| 16              | Sigmund Freud             | Science  | DE      |
| 17              | Madonna (entertainer)     | Art      | EN      |
| 18              | Serge Gainsbourg          | Art      | FR      |
| 19              | 14th Dalai Lama           | Religion | WR      |
| 20              | Alfred Hitchcock          | Art      | EN      |
| 21              | Georges Clemenceau        | Politics | FR      |
| 22              | Carl Linnaeus             | Science  | WR      |
| 23              | Steven Spielberg          | Art      | EN      |
| 24              | J. R. R. Tolkien          | Art      | EN      |
| 25              | Arthur Rimbaud            | Art      | FR      |
| 26              | Charles Darwin            | Science  | EN      |
| 27              | Maximilien de Robespierre | Politics | FR      |
| 28              | Nelson Mandela            | Politics | WR      |
| 29              | Henry IV of France        | Politics | FR      |
| 30              | Charles de Gaulle         | Politics | FR      |

Table S6: Top 30 persons by CheiRank for French Wikipedia with their field of activity and native language.

| $R_{FR,CheiRank}$ | Person                                  | Field    | Culture |
|-------------------|-----------------------------------------|----------|---------|
| 1                 | John Douglas Lynch                      | Science  | EN      |
| 2                 | Roger Federer                           | Sport    | DE      |
| 3                 | Richard Upjohn Light                    | Science  | EN      |
| 4                 | Jacques Davy Duperron                   | Art      | FR      |
| 5                 | Rafael Nadal                            | Sport    | ES      |
| 6                 | Martina Navratilova                     | Sport    | EN      |
| 7                 | Michael Ilmari Saaristo                 | Science  | WR      |
| 8                 | Kevin Bacon                             | Art      | EN      |
| 9                 | Jean Baptiste Eble                      | Etc      | FR      |
| 10                | Marie-Magdeleine Ayme de La Chevreliere | Politics | FR      |
| 11                | Nataliya Pyhyda                         | Sport    | RU      |
| 12                | Max Wolf                                | Science  | DE      |
| 13                | 14th Dalai Lama                         | Religion | WR      |
| 14                | Francoise Hardy                         | Art      | FR      |
| 15                | Ghislaine N. H. Sathoud                 | Etc      | FR      |
| 16                | Frank Glaw                              | Science  | DE      |
| 17                | Johnny Hallyday                         | Art      | FR      |
| 18                | Juan A. Rivero                          | Science  | ES      |
| 19                | Valentino Rossi                         | Sport    | IT      |
| 20                | Sheila (singer)                         | Art      | FR      |
| 21                | Franois Mitterrand                      | Politics | FR      |
| 22                | Christopher Walken                      | Art      | EN      |
| 23                | Georges Clemenceau                      | Politics | FR      |
| 24                | Elgin Loren Elwais                      | Sport    | WR      |
| 25                | Otto von Bismarck                       | Politics | DE      |
| 26                | Edward Drinker Cope                     | Science  | EN      |
| 27                | Rashidi Yekini                          | Sport    | WR      |
| 28                | Tofiri Kibuuka                          | Sport    | WR      |
| 29                | Paola Espinosa                          | Sport    | ES      |
| 30                | Aksana Drahun                           | Sport    | RU      |

Table S7: Top 30 persons by PageRank for German Wikipedia with their field of activity and native language.

| $R_{DE,PageRank}$ | Person                        | Field    | Culture |
|-------------------|-------------------------------|----------|---------|
| 1                 | Napoleon                      | Politics | FR      |
| 2                 | Carl Linnaeus                 | Science  | WR      |
| 3                 | Adolf Hitler                  | Politics | DE      |
| 4                 | Aristotle                     | Science  | WR      |
| 5                 | Johann Wolfgang von Goethe    | Art      | DE      |
| 6                 | Martin Luther                 | Religion | DE      |
| 7                 | Jesus                         | Religion | WR      |
| 8                 | Immanuel Kant                 | Science  | DE      |
| 9                 | Charlemagne                   | Politics | FR      |
| 10                | Plato                         | Science  | WR      |
| 11                | Pope John Paul II             | Religion | WR      |
| 12                | Karl Marx                     | Science  | DE      |
| 13                | Julius Caesar                 | Politics | IT      |
| 14                | Augustus                      | Politics | IT      |
| 15                | Louis XIV of France           | Politics | FR      |
| 16                | Friedrich Schiller            | Art      | DE      |
| 17                | Wolfgang Amadeus Mozart       | Art      | DE      |
| 18                | William Shakespeare           | Art      | EN      |
| 19                | Josef Stalin                  | Politics | RU      |
| 20                | Pope Benedict XVI             | Religion | DE      |
| 21                | Otto von Bismarck             | Politics | DE      |
| 22                | Cicero                        | Politics | IT      |
| 23                | Wilhelm II, German Emperor    | Politics | DE      |
| 24                | Johann Sebastian Bach         | Art      | DE      |
| 25                | Max Weber                     | Science  | DE      |
| 26                | Charles V, Holy Roman Emperor | Politics | ES      |
| 27                | Frederick the Great           | Politics | DE      |
| 28                | Georg Wilhelm Friedrich Hegel | Science  | DE      |
| 29                | Mary (mother of Jesus)        | Religion | WR      |
| 30                | Augustine of Hippo            | Religion | WR      |

Table S8: Top 30 persons by 2DRank for German Wikipedia with their field of activity and native language.

| $R_{DE,2DRank}$ | Person                   | Field    | Culture |
|-----------------|--------------------------|----------|---------|
| 1               | Adolf Hitler             | Politics | DE      |
| 2               | Otto von Bismarck        | Politics | DE      |
| 3               | Pope Paul VI             | Religion | IT      |
| 4               | Ludwig van Beethoven     | Art      | DE      |
| 5               | Franz Kafka              | Art      | DE      |
| 6               | George Frideric Handel   | Art      | DE      |
| 7               | Gerhart Hauptmann        | Art      | DE      |
| 8               | Bob Dylan                | Art      | EN      |
| 9               | Johann Sebastian Bach    | Art      | DE      |
| 10              | Alexander the Great      | Politics | WR      |
| 11              | Martin Luther            | Religion | DE      |
| 12              | Julius Caesar            | Politics | IT      |
| 13              | Joseph Beuys             | Art      | DE      |
| 14              | Pope Leo XIII            | Religion | IT      |
| 15              | Carl Friedrich Gauss     | Science  | DE      |
| 16              | Andy Warhol              | Art      | EN      |
| 17              | Alfred Hitchcock         | Art      | EN      |
| 18              | Thomas Mann              | Art      | DE      |
| 19              | John Lennon              | Art      | EN      |
| 20              | Augustus II the Strong   | Politics | DE      |
| 21              | Pope Benedict XVI        | Religion | DE      |
| 22              | Ferdinand II of Aragon   | Politics | ES      |
| 23              | Arthur Schnitzler        | Art      | DE      |
| 24              | Martin Heidegger         | Science  | DE      |
| 25              | Albrecht Dürer           | Art      | DE      |
| 26              | Carl Linnaeus            | Science  | WR      |
| 27              | Pablo Picasso            | Art      | ES      |
| 28              | Rainer Werner Fassbinder | Art      | DE      |
| 29              | Wolfgang Amadeus Mozart  | Art      | DE      |
| 30              | Historical Jesus         | Religion | WR      |

Table S9: Top 30 persons by CheiRank for German Wikipedia with their field of activity and native language.

| $R_{DE,CheiRank}$ | Person                      | Field    | Culture |
|-------------------|-----------------------------|----------|---------|
| 1                 | Diomedea Carafa             | Religion | IT      |
| 2                 | Harry Pepl                  | Art      | DE      |
| 3                 | Marc Zwiebler               | Sport    | DE      |
| 4                 | Eugen Richter               | Politics | DE      |
| 5                 | John of Nepomuk             | Religion | WR      |
| 6                 | Pope Marcellus II           | Religion | IT      |
| 7                 | Karl Wilhelm Reinmuth       | Science  | WR      |
| 8                 | Johannes Molzahn            | Art      | DE      |
| 9                 | Georges Vanier              | ETC      | FR      |
| 10                | Arthur Willibald Königsheim | ETC      | DE      |
| 11                | Thomas Fitzsimons           | Politics | EN      |
| 12                | Nelson W. Aldrich           | Politics | EN      |
| 13                | Ma Jun                      | ETC      | WR      |
| 14                | Michael Psellos             | Religion | WR      |
| 15                | Adolf Hitler                | Politics | DE      |
| 16                | Edoardo Fazzioli            | ETC      | IT      |
| 17                | Ray Knepper                 | Sport    | EN      |
| 18                | Frédéric de Lafresnaye      | Science  | FR      |
| 19                | Joan Crawford               | Art      | EN      |
| 20                | Stephen King                | Art      | EN      |
| 21                | Gerhart Hauptmann           | Art      | DE      |
| 22                | Paul Moder                  | Politics | DE      |
| 23                | Erni Mangold                | Art      | DE      |
| 24                | Robert Stolz                | Art      | DE      |
| 25                | Otto von Bismarck           | Politics | DE      |
| 26                | Christine Holstein          | Art      | DE      |
| 27                | Pope Paul VI                | Religion | IT      |
| 28                | Franz Buxbaum               | Science  | DE      |
| 29                | Gustaf Gründgens            | Art      | DE      |
| 30                | Ludwig van Beethoven        | Art      | DE      |

Table S10: Top 30 persons by PageRank for Italian Wikipedia with their field of activity and native language.

| $R_{IT,PageRank}$ | Person                        | Field    | Culture |
|-------------------|-------------------------------|----------|---------|
| 1                 | Napoleon                      | Politics | FR      |
| 2                 | Jesus                         | Religion | WR      |
| 3                 | Aristotle                     | Science  | WR      |
| 4                 | Augustus                      | Politics | IT      |
| 5                 | Pope John Paul II             | Religion | WR      |
| 6                 | Dante Alighieri               | Art      | IT      |
| 7                 | Adolf Hitler                  | Politics | DE      |
| 8                 | Julius Caesar                 | Politics | IT      |
| 9                 | Benito Mussolini              | Politics | IT      |
| 10                | Charlemagne                   | Politics | FR      |
| 11                | Mary (mother of Jesus)        | Religion | WR      |
| 12                | Plato                         | Science  | WR      |
| 13                | Isaac Newton                  | Science  | EN      |
| 14                | Charles V, Holy Roman Emperor | Politics | ES      |
| 15                | Galileo Galilei               | Science  | IT      |
| 16                | Louis XIV of France           | Politics | FR      |
| 17                | Constantine the Great         | Politics | IT      |
| 18                | Cicero                        | Politics | IT      |
| 19                | Alexander the Great           | Politics | WR      |
| 20                | Paul the Apostle              | Politics | WR      |
| 21                | Albert Einstein               | Science  | DE      |
| 22                | Joseph Stalin                 | Politics | RU      |
| 23                | George W. Bush                | Politics | EN      |
| 24                | Silvio Berlusconi             | Politics | IT      |
| 25                | William Shakespeare           | Art      | EN      |
| 26                | Augustine of Hippo            | Religion | WR      |
| 27                | Pope Paul VI                  | Religion | IT      |
| 28                | Pope Benedict XVI             | Religion | DE      |
| 29                | Giuseppe Garibaldi            | Politics | IT      |
| 30                | Leonardo da Vinci             | Science  | IT      |

Table S11: Top 30 persons by 2DRank for Italian Wikipedia with their field of activity and native language.

| $R_{IT,2DRank}$ | Person                  | Field    | Culture |
|-----------------|-------------------------|----------|---------|
| 1               | Pope John Paul II       | Religion | WR      |
| 2               | Pope Benedict XVI       | Religion | DE      |
| 3               | Giuseppe Garibaldi      | Politics | IT      |
| 4               | Raphael                 | Art      | IT      |
| 5               | Jesus                   | Religion | WR      |
| 6               | Benito Mussolini        | Politics | IT      |
| 7               | Michelangelo            | Art      | IT      |
| 8               | Leonardo da Vinci       | Art      | IT      |
| 9               | Pier Paolo Pasolini     | Art      | IT      |
| 10              | Michael Jackson         | Art      | EN      |
| 11              | Martina Navratilova     | Sport    | EN      |
| 12              | Saint Peter             | Religion | WR      |
| 13              | Pope Paul III           | Religion | IT      |
| 14              | Wolfgang Amadeus Mozart | Art      | DE      |
| 15              | John Lennon             | Art      | EN      |
| 16              | Bob Dylan               | Art      | EN      |
| 17              | Mina (singer)           | Art      | IT      |
| 18              | William Shakespeare     | Art      | EN      |
| 19              | Julius Caesar           | Politics | IT      |
| 20              | Titian                  | Art      | IT      |
| 21              | Silvio Berlusconi       | Politics | IT      |
| 22              | Alexander the Great     | Politics | WR      |
| 23              | Pablo Picasso           | Art      | ES      |
| 24              | Antonio Vivaldi         | Art      | IT      |
| 25              | Ludwig van Beethoven    | Art      | DE      |
| 26              | Napoleon                | Politics | FR      |
| 27              | Madonna (entertainer)   | Art      | EN      |
| 28              | Roger Federer           | Sport    | DE      |
| 29              | Johann Sebastian Bach   | Art      | DE      |
| 30              | Walt Disney             | Art      | EN      |

Table S12: Top 30 persons by CheiRank for Italian Wikipedia with their field of activity and native language.

| $R_{IT,CheiRank}$ | Person                | Field    | Culture |
|-------------------|-----------------------|----------|---------|
| 1                 | Ticone di Amato       | Religion | WR      |
| 2                 | John the Merciful     | Religion | WR      |
| 3                 | Nduccio               | Art      | IT      |
| 4                 | Vincenzo Olivieri     | Art      | IT      |
| 5                 | Leo Baeck             | Religion | DE      |
| 6                 | Karl Wilhelm Reinmuth | Science  | DE      |
| 7                 | Freimut Börngen       | Science  | DE      |
| 8                 | Nikolai Chernykh      | Science  | RU      |
| 9                 | Edward L. G. Bowell   | Science  | EN      |
| 10                | Roger Federer         | Sport    | DE      |
| 11                | Michel Morganella     | Sport    | WR      |
| 12                | Rafael Nadal          | Sport    | ES      |
| 13                | Robin Söderling       | Sport    | WR      |
| 14                | Iván Zamorano         | Sport    | ES      |
| 15                | Martina Navratilova   | Sport    | EN      |
| 16                | Venus Williams        | Sport    | EN      |
| 17                | Goran Ivanišević      | Sport    | WR      |
| 18                | Javier Pastore        | Sport    | ES      |
| 19                | Stevan Jovetić        | Sport    | WR      |
| 20                | Mina (singer)         | Art      | IT      |
| 21                | George Ade            | Art      | EN      |
| 22                | Kazuro Watanabe       | Sport    | WR      |
| 23                | Andy Roddick          | Sport    | EN      |
| 24                | Johann Strauss II     | Art      | DE      |
| 25                | Max Wolf              | Science  | DE      |
| 26                | Isaac Asimov          | Art      | EN      |
| 27                | Georges Simenon       | Art      | FR      |
| 28                | Alice Joyce           | Art      | EN      |
| 29                | Pietro De Sensi       | Sport    | IT      |
| 30                | Noemi (singer)        | Art      | IT      |



Table S13: Top 30 persons by PageRank for Spanish Wikipedia with their field of activity and native language.

| $R_{ES,PageRank}$ | Person                        | Field    | Culture |
|-------------------|-------------------------------|----------|---------|
| 1                 | Carl Linnaeus                 | Science  | WR      |
| 2                 | Napoleon                      | Politics | FR      |
| 3                 | Jesus                         | Religion | WR      |
| 4                 | Aristotle                     | Science  | WR      |
| 5                 | Charles V, Holy Roman Emperor | Politics | ES      |
| 6                 | Adolf Hitler                  | Politics | DE      |
| 7                 | Julius Caesar                 | Politics | IT      |
| 8                 | Philip II of Spain            | Politics | ES      |
| 9                 | William Shakespeare           | Art      | EN      |
| 10                | Plato                         | Science  | WR      |
| 11                | Albert Einstein               | Science  | DE      |
| 12                | Augustus                      | Politics | IT      |
| 13                | Pope John Paul II             | Religion | WR      |
| 14                | Christopher Columbus          | ETC      | IT      |
| 15                | Karl Marx                     | Science  | DE      |
| 16                | Alexander the Great           | Politics | WR      |
| 17                | Isaac Newton                  | Science  | EN      |
| 18                | Francisco Franco              | Politics | ES      |
| 19                | Charlemagne                   | Politics | FR      |
| 20                | Immanuel Kant                 | Science  | DE      |
| 21                | Charles Darwin                | Science  | EN      |
| 22                | Louis XIV of France           | Politics | FR      |
| 23                | Mary (mother of Jesus)        | Religion | WR      |
| 24                | Wolfgang Amadeus Mozart       | Art      | DE      |
| 25                | Galileo Galilei               | Science  | IT      |
| 26                | Cicero                        | Politics | IT      |
| 27                | Homer                         | Art      | WR      |
| 28                | Paul the Apostle              | Religion | WR      |
| 29                | René Descartes                | Science  | FR      |
| 30                | Miguel de Cervantes           | Art      | ES      |

Table S14: Top 30 persons by 2DRank for Spanish Wikipedia with their field of activity and native language.

| $\overline{R}_{ES,2DRank}$ | Person                  | Field    | Culture |
|----------------------------|-------------------------|----------|---------|
| 1                          | Wolfgang Amadeus Mozart | Art      | DE      |
| 2                          | Julius Caesar           | Politics | IT      |
| 3                          | Simón Bolívar           | Politics | ES      |
| 4                          | Francisco Goya          | Art      | ES      |
| 5                          | Madonna (entertainer)   | Art      | EN      |
| 6                          | Bob Dylan               | Art      | EN      |
| 7                          | Barack Obama            | Politics | EN      |
| 8                          | Fidel Castro            | Politics | ES      |
| 9                          | Michael Jackson         | Art      | EN      |
| 10                         | Richard Wagner          | Art      | DE      |
| 11                         | Augusto Pinochet        | Politics | ES      |
| 12                         | Trajan                  | Politics | IT      |
| 13                         | Jorge Luis Borges       | Art      | ES      |
| 14                         | Juan Perón              | Politics | ES      |
| 15                         | Porfirio Díaz           | Politics | ES      |
| 16                         | Michelangelo            | Art      | IT      |
| 17                         | J. R. R. Tolkien        | Art      | EN      |
| 18                         | Paul McCartney          | Art      | EN      |
| 19                         | Adolf Hitler            | Politics | DE      |
| 20                         | John Lennon             | Art      | EN      |
| 21                         | Hugo Chávez             | Politics | ES      |
| 22                         | Elizabeth II            | Politics | EN      |
| 23                         | Lope de Vega            | Art      | ES      |
| 24                         | Francisco Franco        | Politics | ES      |
| 25                         | Christopher Columbus    | ETC      | IT      |
| 26                         | Diego Velázquez         | Art      | ES      |
| 27                         | Pablo Picasso           | Art      | ES      |
| 28                         | Edgar Allan Poe         | Art      | EN      |
| 29                         | Charlemagne             | Politics | FR      |
| 30                         | Juan Carlos I of Spain  | Politics | ES      |

Table S15: Top 30 persons by CheiRank for Spanish Wikipedia with their field of activity and native language.

| $R_{ES,CheiRank}$ | Person                       | Field    | Culture |
|-------------------|------------------------------|----------|---------|
| 1                 | Max Wolf                     | Science  | DE      |
| 2                 | Monica Bellucci              | Art      | IT      |
| 3                 | Che Guevara                  | Politics | ES      |
| 4                 | Steve Buscemi                | Art      | EN      |
| 5                 | Johann Palisa                | Science  | DE      |
| 6                 | Auguste Charlois             | Science  | FR      |
| 7                 | José Flávio Pessoa de Barros | Science  | WR      |
| 8                 | Arturo Mercado               | Art      | ES      |
| 9                 | Francisco Goya               | Art      | ES      |
| 10                | Bob Dylan                    | Art      | EN      |
| 11                | Jorge Luis Borges            | Art      | ES      |
| 12                | Brian May                    | Art      | EN      |
| 13                | Virgilio Barco Vargas        | Politics | ES      |
| 14                | Mariano Bellver              | ETC      | ES      |
| 15                | Demi Lovato                  | Art      | EN      |
| 16                | Joan Manuel Serrat           | Art      | ES      |
| 17                | Mary Shelley                 | Art      | EN      |
| 18                | Ana Belén                    | Art      | ES      |
| 19                | Aki Misato                   | Art      | WR      |
| 20                | Carl Jung                    | Science  | DE      |
| 21                | Roger Federer                | Sport    | DE      |
| 22                | Antoni Gaudí                 | Art      | ES      |
| 23                | Rafael Nadal                 | Sport    | ES      |
| 24                | Hans Melchior                | Science  | DE      |
| 25                | Paulina Rubio                | Art      | ES      |
| 26                | Paul McCartney               | Art      | EN      |
| 27                | Julieta Venegas              | Art      | ES      |
| 28                | Fermin Muguruza              | Art      | ES      |
| 29                | Belinda (entertainer)        | Art      | ES      |
| 30                | Patricia Acevedo             | Art      | ES      |

Table S16: Top 30 persons by PageRank for Dutch Wikipedia with their field of activity and native language.

| $R_{NL,PageRank}$ | Person                        | Field    | Culture |
|-------------------|-------------------------------|----------|---------|
| 1                 | Carl Linnaeus                 | Science  | WR      |
| 2                 | Pierre Andre Latreille        | Science  | FR      |
| 3                 | Napoleon                      | Politics | FR      |
| 4                 | Eugene Simon                  | Science  | FR      |
| 5                 | Jesus                         | Religion | WR      |
| 6                 | Charles Darwin                | Science  | EN      |
| 7                 | Julius Caesar                 | Politics | IT      |
| 8                 | Adolf Hitler                  | Politics | DE      |
| 9                 | Aristotle                     | Science  | WR      |
| 10                | Charlemagne                   | Politics | FR      |
| 11                | Plato                         | Science  | WR      |
| 12                | Jean-Baptiste Lamarck         | Science  | FR      |
| 13                | Ernst Mayr                    | Science  | DE      |
| 14                | Alexander the Great           | Politics | WR      |
| 15                | Louis XIV of France           | Politics | FR      |
| 16                | Pope John Paul II             | Religion | WR      |
| 17                | Alfred Russel Wallace         | Science  | EN      |
| 18                | Charles V, Holy Roman Emperor | Politics | ES      |
| 19                | Thomas Robert Malthus         | Science  | EN      |
| 20                | Augustus                      | Politics | IT      |
| 21                | William I of the Netherlands  | Politics | NL      |
| 22                | Joseph Stalin                 | Politics | RU      |
| 23                | Albert Einstein               | Science  | DE      |
| 24                | Beatrix of the Netherlands    | Politics | NL      |
| 25                | Christopher Columbus          | Etc      | IT      |
| 26                | Elizabeth II                  | Politics | EN      |
| 27                | Isaac Newton                  | Science  | EN      |
| 28                | Wolfgang Amadeus Mozart       | Art      | DE      |
| 29                | J. B. S. Haldane              | Science  | EN      |
| 30                | Cicero                        | Politics | IT      |

Table S17: Top 30 persons by 2DRank for Dutch Wikipedia with their field of activity and native language.

| $R_{NL,2DRank}$ | Person                        | Field    | Culture |
|-----------------|-------------------------------|----------|---------|
| 1               | Pope Benedict XVI             | Religion | DE      |
| 2               | Elizabeth II                  | Politics | EN      |
| 3               | Charles Darwin                | Science  | EN      |
| 4               | Albert II of Belgium          | Politics | NL      |
| 5               | Albert Einstein               | Science  | DE      |
| 6               | Pope John Paul II             | Religion | WR      |
| 7               | Michael Jackson               | Art      | EN      |
| 8               | Johann Sebastian Bach         | Art      | DE      |
| 9               | Saint Peter                   | Religion | WR      |
| 10              | Johan Cruyff                  | Sport    | NL      |
| 11              | William Shakespeare           | Art      | EN      |
| 12              | Christopher Columbus          | Etc      | IT      |
| 13              | Augustus                      | Politics | IT      |
| 14              | Frederick the Great           | Politics | DE      |
| 15              | Rembrandt                     | Art      | NL      |
| 16              | Eddy Merckx                   | Sport    | NL      |
| 17              | Ludwig van Beethoven          | Art      | DE      |
| 18              | Pope Pius XII                 | Religion | IT      |
| 19              | Peter Paul Rubens             | Art      | NL      |
| 20              | Napoleon                      | Politics | FR      |
| 21              | Wolfgang Amadeus Mozart       | Art      | DE      |
| 22              | Igor Stravinsky               | Art      | RU      |
| 23              | Martin of Tours               | Religion | FR      |
| 24              | Geert Wilders                 | Politics | NL      |
| 25              | J.R.R. Tolkien                | Art      | EN      |
| 26              | Pierre Cuypers                | Art      | NL      |
| 27              | Charles V, Holy Roman Emperor | Politics | ES      |
| 28              | Pope Pius IX                  | Religion | IT      |
| 29              | Juliana of the Netherlands    | Politics | NL      |
| 30              | Elvis Presley                 | Art      | EN      |

Table S18: Top 30 persons by CheiRank for Dutch Wikipedia with their field of activity and native language.

| $R_{NL,CheiRank}$ | Person                | Field    | Culture |
|-------------------|-----------------------|----------|---------|
| 1                 | Pier Luigi Bersani    | Politics | IT      |
| 2                 | Francesco Rutelli     | Politics | IT      |
| 3                 | Hans Renders          | Science  | NL      |
| 4                 | Julian Jenner         | Sport    | NL      |
| 5                 | Marten Toonder        | Art      | NL      |
| 6                 | Uwe Seeler            | Sport    | DE      |
| 7                 | Stefanie Sun          | Art      | WR      |
| 8                 | Roger Federer         | Sport    | DE      |
| 9                 | Theo Janssen          | Sport    | NL      |
| 10                | Zazie                 | Art      | FR      |
| 11                | Albert II of Belgium  | Politics | NL      |
| 12                | Denny Landzaat        | Sport    | NL      |
| 13                | Paul Biegel           | Art      | NL      |
| 14                | Guido De Padt         | Politics | NL      |
| 15                | Jan Knippenberg       | Sport    | NL      |
| 16                | Michael Schumacher    | Sport    | DE      |
| 17                | Hans Werner Henze     | Art      | DE      |
| 18                | Lionel Messi          | Sport    | ES      |
| 19                | Johan Crujff          | Sport    | NL      |
| 20                | Eva Janssen (actrice) | Art      | NL      |
| 21                | Marion Zimmer Bradley | Art      | EN      |
| 22                | Graham Hill           | Sport    | EN      |
| 23                | Rick Wakeman          | Art      | EN      |
| 24                | Mihai Nesu            | Sport    | NL      |
| 25                | Freddy De Chou        | Politics | NL      |
| 26                | Rubens Barrichello    | Sport    | WR      |
| 27                | Ismail Aissati        | Sport    | NL      |
| 28                | Marco van Basten      | Sport    | NL      |
| 29                | Paul Geerts           | Art      | NL      |
| 30                | Ibrahim Afellay       | Sport    | NL      |

Table S19: Top 30 persons by PageRank for Russian Wikipedia with their field of activity and native language.

| $R_{RU,PageRank}$ | Person                 | Field    | Culture |
|-------------------|------------------------|----------|---------|
| 1                 | Peter the Great        | Politics | RU      |
| 2                 | Napoleon               | Politics | FR      |
| 3                 | Carl Linnaeus          | Science  | WR      |
| 4                 | Joseph Stalin          | Politics | RU      |
| 5                 | Alexander Pushkin      | Art      | RU      |
| 6                 | Vladimir Lenin         | Politics | RU      |
| 7                 | Catherine the Great    | Politics | RU      |
| 8                 | Jesus                  | Religion | WR      |
| 9                 | Aristotle              | Science  | WR      |
| 10                | Vladimir Putin         | Politics | RU      |
| 11                | Julius Caesar          | Politics | IT      |
| 12                | Adolf Hitler           | Politics | DE      |
| 13                | Boris Yeltsin          | Politics | RU      |
| 14                | William Shakespeare    | Art      | EN      |
| 15                | Ivan the Terrible      | Politics | RU      |
| 16                | Alexander II of Russia | Politics | RU      |
| 17                | Nicholas II of Russia  | Politics | RU      |
| 18                | Karl Marx              | Science  | DE      |
| 19                | Louis XIV of France    | Politics | FR      |
| 20                | Nicholas I of Russia   | Politics | RU      |
| 21                | Alexander I of Russia  | Politics | RU      |
| 22                | Alexander the Great    | Politics | WR      |
| 23                | Charlemagne            | Politics | FR      |
| 24                | William Herschel       | Science  | EN      |
| 25                | Mikhail Gorbachev      | Politics | RU      |
| 26                | Paul I of Russia       | Politics | RU      |
| 27                | Leo Tolstoy            | Art      | RU      |
| 28                | Nikolai Gogol          | Art      | RU      |
| 29                | Dmitry Medvedev        | Politics | RU      |
| 30                | Lomonosov              | Science  | RU      |

Table S20: Top 30 persons by 2DRank for Russian Wikipedia with their field of activity and native language.

| $R_{RU,2DRank}$ | Person                 | Field    | Culture |
|-----------------|------------------------|----------|---------|
| 1               | Dmitri Mendeleev       | Science  | RU      |
| 2               | Peter the Great        | Politics | RU      |
| 3               | Justinian I            | Politics | WR      |
| 4               | Yaroslav the Wise      | Politics | RU      |
| 5               | Elvis Presley          | Art      | EN      |
| 6               | Yuri Gagarin           | Etc      | RU      |
| 7               | William Shakespeare    | Art      | EN      |
| 8               | Albert Einstein        | Science  | DE      |
| 9               | Adolf Hitler           | Politics | DE      |
| 10              | Christopher Columbus   | Etc      | IT      |
| 11              | Catherine the Great    | Politics | RU      |
| 12              | Vladimir Vysotsky      | Art      | RU      |
| 13              | Louis de Funes         | Art      | FR      |
| 14              | Lomonosov              | Science  | RU      |
| 15              | Alla Pugacheva         | Art      | RU      |
| 16              | Viktor Yanukovich      | Politics | RU      |
| 17              | Nikolai Gogol          | Art      | RU      |
| 18              | Felix Dzerzhinsky      | Politics | RU      |
| 19              | Aleksandr Solzhenitsyn | Art      | RU      |
| 20              | Pope Benedict XVI      | Religion | DE      |
| 21              | Maxim Gorky            | Art      | RU      |
| 22              | Julius Caesar          | Politics | IT      |
| 23              | George Harrison        | Art      | EN      |
| 24              | Bohdan Khmelnytsky     | Politics | RU      |
| 25              | Rembrandt              | Art      | NL      |
| 26              | John Lennon            | Art      | EN      |
| 27              | Jules Verne            | Art      | FR      |
| 28              | Benito Mussolini       | Politics | IT      |
| 29              | Nicholas Roerich       | Art      | RU      |
| 30              | Niels Bohr             | Science  | WR      |



Table S21: Top 30 persons by CheiRank for Russian Wikipedia with their field of activity and native language.

| $R_{RU,CheiRank}$ | Person                              | Field    | Culture |
|-------------------|-------------------------------------|----------|---------|
| 1                 | Aleksander Vladimirovich Sotnik     | Etc      | RU      |
| 2                 | Aleksei Aleksandrovich Bobrinsky    | Politics | RU      |
| 3                 | Boris Grebenshchikov                | Art      | RU      |
| 4                 | Karl Wilhelm Reinmuth               | Science  | DE      |
| 5                 | Ronnie O'Sullivan                   | Sport    | EN      |
| 6                 | Max Wol                             | Science  | DE      |
| 7                 | Ivan Egorovich Sizykh               | Etc      | RU      |
| 8                 | Vladimir Mikhailovich Popkov        | Art      | RU      |
| 9                 | Sun Myung Moon                      | Religion | KO      |
| 10                | Mikhail Pavlovich Tolstoi           | Etc      | RU      |
| 11                | Perry Como                          | Art      | EN      |
| 12                | John Heenan                         | Religion | EN      |
| 13                | Petr Aleksandrovich Ivaschenko      | Art      | RU      |
| 14                | Andrey Vlasov                       | Etc      | RU      |
| 15                | Christian Heinrich Friedrich Peters | Science  | DE      |
| 16                | Auguste Charlois                    | Science  | FR      |
| 17                | Damian (Marczhuk)                   | Religion | RU      |
| 18                | Yuri Gagarin                        | Etc      | RU      |
| 19                | Stephen Hendry                      | Sport    | EN      |
| 20                | Ivan Grigorevich Donskikh           | Etc      | RU      |
| 21                | Anna Semenovna Kamenkova-Pavlova    | Art      | RU      |
| 22                | Ivan Nikolaevich Shulga             | Art      | RU      |
| 23                | George Dwyer                        | Religion | EN      |
| 24                | William Wheeler (bishop)            | Religion | EN      |
| 25                | Vladimir Vladimirovitsch Antonik    | Art      | RU      |
| 26                | Leonid Parfyonov                    | Art      | RU      |
| 27                | Vincent Nichols                     | Religion | EN      |
| 28                | Dmitri Mendeleev                    | Science  | RU      |
| 29                | Boris Vladimirovich Bakin           | Etc      | RU      |
| 30                | George Harrison                     | Art      | EN      |

Table S22: Top 30 persons by PageRank for Hungarian Wikipedia with their field of activity and native language.

| $R_{HU,PageRank}$ | Person                        | Field    | Culture |
|-------------------|-------------------------------|----------|---------|
| 1                 | Carl Linnaeus                 | Science  | WR      |
| 2                 | Jesus                         | Religion | WR      |
| 3                 | Napoleon                      | Politics | FR      |
| 4                 | Aristotle                     | Science  | WR      |
| 5                 | Julius Caesar                 | Politics | IT      |
| 6                 | Matthias Corvinus             | Politics | HU      |
| 7                 | Szentagotthai Janos           | Science  | HU      |
| 8                 | William Shakespeare           | Art      | EN      |
| 9                 | Adolf Hitler                  | Politics | DE      |
| 10                | Stephen I of Hungary          | Politics | HU      |
| 11                | Augustus                      | Politics | IT      |
| 12                | Michael Schumacher            | Sport    | DE      |
| 13                | Miklos Rethelyi               | Politics | HU      |
| 14                | Sigismund, Holy Roman Emperor | Politics | HU      |
| 15                | Lajos Kossuth                 | Politics | HU      |
| 16                | Charles I of Hungary          | Politics | HU      |
| 17                | Bela IV of Hungary            | Politics | HU      |
| 18                | Maria Theresa                 | Politics | DE      |
| 19                | Joseph Stalin                 | Politics | RU      |
| 20                | Franz Joseph I of Austria     | Politics | DE      |
| 21                | Louis I of Hungary            | Politics | HU      |
| 22                | Francis II Rakoczi            | Politics | HU      |
| 23                | Mary (mother of Jesus)        | Religion | WR      |
| 24                | Sandor Petofi                 | Art      | HU      |
| 25                | Pope John Paul II             | Religion | WR      |
| 26                | Johann Wolfgang von Goethe    | Art      | DE      |
| 27                | Alexander the Great           | Politics | WR      |
| 28                | Bela Bartok                   | Art      | HU      |
| 29                | Charlemagne                   | Politics | FR      |
| 30                | Louis XIV of France           | Politics | FR      |

Table S23: Top 30 persons by 2DRank for Hungarian Wikipedia with their field of activity and native language.

| $R_{HU,2DRank}$ | Person                    | Field    | Culture |
|-----------------|---------------------------|----------|---------|
| 1               | Stephen I of Hungary      | Politics | HU      |
| 2               | Sandor Petofi             | Art      | HU      |
| 3               | Franz Liszt               | Art      | HU      |
| 4               | Kati Kovacs               | Art      | HU      |
| 5               | Alexander the Great       | Politics | WR      |
| 6               | Attila Jozsef             | Art      | HU      |
| 7               | Aristotle                 | Science  | WR      |
| 8               | Kimi Raikkonen            | Sport    | WR      |
| 9               | Rubens Barrichello        | Sport    | WR      |
| 10              | Lajos Kossuth             | Politics | HU      |
| 11              | Bela Bartok               | Art      | HU      |
| 12              | Charlemagne               | Politics | FR      |
| 13              | Sandor Weores             | Art      | HU      |
| 14              | Mariah Carey              | Art      | EN      |
| 15              | Wolfgang Amadeus Mozart   | Art      | DE      |
| 16              | Josip Broz Tito           | Politics | WR      |
| 17              | Charles I of Hungary      | Politics | HU      |
| 18              | Isaac Asimov              | Art      | EN      |
| 19              | Napoleon                  | Politics | FR      |
| 20              | Bonnie Tyler              | Art      | EN      |
| 21              | Miklos Radnoti            | Art      | HU      |
| 22              | Jay Chou                  | Art      | WR      |
| 23              | Janos Kodolanyi           | Art      | HU      |
| 24              | Louis I of Hungary        | Politics | HU      |
| 25              | Zsuzsa Koncz              | Art      | HU      |
| 26              | Adolf Hitler              | Politics | HU      |
| 27              | Stephen King              | Art      | EN      |
| 28              | Mor Jokai                 | Art      | HU      |
| 29              | Ferenc Erkel              | Art      | HU      |
| 30              | Franz Joseph I of Austria | Politics | DE      |

Table S24: Top 30 persons by CheiRank for Hungarian Wikipedia with their field of activity and native language.

| $R_{HU,CheiRank}$ | Person                   | Field   | Culture |
|-------------------|--------------------------|---------|---------|
| 1                 | Edward L. G. Bowell      | Science | EN      |
| 2                 | Karl Wilhelm Reinmuth    | Science | DE      |
| 3                 | Max Wolf                 | Science | DE      |
| 4                 | Benjamin Boukpeti        | Sport   | FR      |
| 5                 | Urata Takesi             | Science | WR      |
| 6                 | Wilfred Bungei           | Sport   | WR      |
| 7                 | Henri Debehogne          | Science | FR      |
| 8                 | Lee "Scratch" Perry      | Art     | WR      |
| 9                 | Karl Golsdorf            | Etc     | DE      |
| 10                | Johann Palisa            | Science | DE      |
| 11                | Dirk Kuijt               | Sport   | NL      |
| 12                | Roger Federer            | Sport   | DE      |
| 13                | Csernus Imre             | Etc     | HU      |
| 14                | Kati Kovacs              | Art     | HU      |
| 15                | Rafael Nadal             | Sport   | ES      |
| 16                | Venus Williams           | Sport   | EN      |
| 17                | Sebastien Loeb           | Sport   | FR      |
| 18                | Pleh Csaba               | Science | HU      |
| 19                | Tibor Antalpeter         | Sport   | HU      |
| 20                | Serena Williams          | Sport   | EN      |
| 21                | Csore Gabor              | Art     | HU      |
| 22                | Pirmin Schwegler         | Sport   | DE      |
| 23                | Olivia Newton-John       | Art     | EN      |
| 24                | Petter Solberg           | Sport   | WR      |
| 25                | Orosz Anna               | Art     | HU      |
| 26                | Zsambeki Gabor           | Art     | HU      |
| 27                | Vera Igorevna Zvonarjova | Sport   | RU      |
| 28                | Sandor Petofi            | Art     | HU      |
| 29                | Roberta Vinci            | Sport   | IT      |
| 30                | Flavia Pennetta          | Sport   | HU      |

Table S25: Top 30 persons by PageRank for Korean Wikipedia with their field of activity and native language.

| $R_{KO,PageRank}$ | Person                      | Field    | Culture |
|-------------------|-----------------------------|----------|---------|
| 1                 | Carl Linnaeus               | Science  | WR      |
| 2                 | Gojong of the Korean Empire | Politics | KO      |
| 3                 | Jesus                       | Religion | WR      |
| 4                 | John Edward Gray            | Science  | EN      |
| 5                 | Aristotle                   | Science  | WR      |
| 6                 | Napoleon                    | Politics | FR      |
| 7                 | Sejong the Great            | Politics | KO      |
| 8                 | Park Chung-hee              | Politics | KO      |
| 9                 | Emperor Wu of Han           | Politics | WR      |
| 10                | Seonjo of Joseon            | Politics | KO      |
| 11                | Taejong of Joseon           | Politics | KO      |
| 12                | Syngman Rhee                | Politics | KO      |
| 13                | Kim Dae-jung                | Politics | KO      |
| 14                | Roh Moo-hyun                | Politics | KO      |
| 15                | Yeongjo of Joseon           | Politics | KO      |
| 16                | Adolf Hitler                | Politics | DE      |
| 17                | Taejo of Joseon             | Politics | KO      |
| 18                | Sukjong of Joseon           | Politics | KO      |
| 19                | Kim Il-sung                 | Politics | KO      |
| 20                | Qianlong Emperor            | Politics | WR      |
| 21                | Kim Jong-il                 | Politics | KO      |
| 22                | Kangxi Emperor              | Politics | WR      |
| 23                | Emperor Gaozu of Han        | Politics | WR      |
| 24                | Chun Doo-hwan               | Politics | KO      |
| 25                | Taejo of Goryeo             | Politics | KO      |
| 26                | George W. Bush              | Politics | EN      |
| 27                | Qin Shi Huang               | Politics | WR      |
| 28                | Jeongjo of Joseon           | Politics | KO      |
| 29                | Sunjo of Joseon             | Politics | KO      |
| 30                | Cao Cao                     | Politics | WR      |

Table S26: Top 30 persons by 2DRank for Korean Wikipedia with their field of activity and native language.

| $R_{KO,2DRank}$ | Person                      | Field    | Culture |
|-----------------|-----------------------------|----------|---------|
| 1               | Gojong of the Korean Empire | Politics | KO      |
| 2               | Sejong the Great            | Politics | KO      |
| 3               | Park Chung-hee              | Politics | KO      |
| 4               | Taejong of Joseon           | Politics | KO      |
| 5               | Kim Dae-jung                | Politics | KO      |
| 6               | Roh Moo-hyun                | Politics | KO      |
| 7               | Syngman Rhee                | Politics | KO      |
| 8               | Kim Il-sung                 | Politics | KO      |
| 9               | Qianlong Emperor            | Politics | WR      |
| 10              | Kangxi Emperor              | Politics | WR      |
| 11              | Taejo of Goryeo             | Politics | KO      |
| 12              | Seonjo of Joseon            | Politics | KO      |
| 13              | Jeongjo of Joseon           | Politics | KO      |
| 14              | Kim Young-sam               | Politics | KO      |
| 15              | Julius Caesar               | Politics | IT      |
| 16              | Chun Doo-hwan               | Politics | KO      |
| 17              | Injo of Joseon              | Politics | KO      |
| 18              | Tokugawa Ieyasu             | Politics | WR      |
| 19              | Lee Myung-bak               | Politics | KO      |
| 20              | Seongjong of Joseon         | Politics | KO      |
| 21              | Cao Cao                     | Politics | WR      |
| 22              | Confucius                   | Science  | WR      |
| 23              | Mao Zedong                  | Politics | WR      |
| 24              | Taejo of Joseon             | Politics | KO      |
| 25              | Toyotomi Hideyoshi          | Politics | WR      |
| 26              | Heungseon Daewongun         | Politics | KO      |
| 27              | Liu Bei                     | Politics | WR      |
| 28              | Yeongjo of Joseon           | Politics | KO      |
| 29              | Pope John Paul II           | Religion | WR      |
| 30              | Adolf Hitler                | Politics | DE      |

Table S27: Top 30 persons by CheiRank for Korean Wikipedia with their field of activity and native language.

| $R_{KO,CheiRank}$ | Person                   | Field    | Culture |
|-------------------|--------------------------|----------|---------|
| 1                 | Lee Jong-wook (baseball) | Sport    | KO      |
| 2                 | Kim Dae-jung             | Politics | KO      |
| 3                 | Lionel Messi             | Sport    | ES      |
| 4                 | Kim Kyu-sik              | Politics | KO      |
| 5                 | Johannes Kepler          | Science  | DE      |
| 6                 | Yun Chi-young            | Politics | KO      |
| 7                 | Michael Jackson          | Art      | EN      |
| 8                 | Yi Sun-sin               | ETC      | KO      |
| 9                 | Chang Myon               | Politics | KO      |
| 10                | IU (singer)              | Art      | KO      |
| 11                | Kim Seo-yeong            | Art      | KO      |
| 12                | Tokugawa Ieyasu          | Politics | WR      |
| 13                | Jeremy Renner            | Art      | EN      |
| 14                | Zhao Deyin               | Politics | WR      |
| 15                | Yang Joon-Hyu            | Sport    | KO      |
| 16                | Zhang Gui (Tang Dynasty) | Politics | WR      |
| 17                | Zinedine Zidane          | Sport    | FR      |
| 18                | Park Chung-hee           | Politics | KO      |
| 19                | Heungseon Daewongun      | Politics | KO      |
| 20                | Ahn Ji-hwan              | Art      | KO      |
| 21                | Lee Seung-Yeop           | Sport    | KO      |
| 22                | Roh Moo-hyun             | Politics | KO      |
| 23                | Britney Spears           | Art      | EN      |
| 24                | Kim Young-sam            | Politics | KO      |
| 25                | Jeong Hyeong-don         | Art      | KO      |
| 26                | Kim Yu-Na                | Sport    | KO      |
| 27                | Park Jong-Seol           | Art      | KO      |
| 28                | Lim Taekyoung            | Art      | KO      |
| 29                | Park Ji-Sung             | Sport    | KO      |
| 30                | Yuh Woon-Hyung           | Politics | KO      |
